# Supplementary material for: Molecular Responses to Thermal and Osmotic Stress in Arctic Intertidal Mussels (Mytilus edulis): The Limits of Resilience
Source: MDPI journal article supplement (doi:10.3390/genes13010155), 2022-01-15

**Supplementary material for:**

Molecular responses to thermal and osmotic stress in Arctic intertidal mussels

(*Mytilus edulis*): the limits of resilience

Nicholas J. Barrett, Jakob Thyrring, Elizabeth M. Harper, Mikael K. Sejr, Jesper G. Sørensen, Lloyd S. Peck and Melody S. Clark

**Supplementary Table S1.** Accession numbers for aquaporin genes used in the phylogenetic analysis (see Figure 4).

| Accession number | Animal        | Aquaporin gene                                        |
|------------------|---------------|-------------------------------------------------------|
| NP_776362        | Cattle        | Aquaporin-0 [Bos taurus]                              |
| P47865.3         | Cattle        | Aquaporin-1 [Bos Taurus]                              |
| NP_001094669.1   | Cattle        | Aquaporin-2 [Bos Taurus]                              |
| Q08DE6.1         | Cattle        | Aquaporin-3 [Bos Taurus]                              |
| AAI18416.1       | Cattle        | Aquaporin 4 [Bos Taurus]                              |
| NP_001178089.1   | Cattle        | Aquaporin-5 [Bos Taurus]                              |
| XP_002687325.1   | Cattle        | Aquaporin-6 [Bos Taurus]                              |
| NP_001069846.1   | Cattle        | Aquaporin-7 [Bos Taurus]                              |
| NP_001193536.1   | Cattle        | Aquaporin-8 [Bos Taurus]                              |
| XP_015328630.1   | Cattle        | Aquaporin-9 Isoform X2 [Bos Taurus]                   |
| XP_024845589.1   | Cattle        | Aquaporin-10 [Bos Taurus]                             |
| NP_001103539.1   | Cattle        | Aquaporin-11 [Bos Taurus]                             |
| XP_005205120.1   | Cattle        | Aquaporin-12 [Bos Taurus]                             |
| AAC52416         | House mouse   | Aquaporin-0_[Mus musculus]                            |
| EDK98728.1       | House mouse   | Aquaporin 1 [Mus Musculus]                            |
| AAD21017.1       | House mouse   | Aquaporin 2 [Mus Musculus]                            |
| EDL05416.1       | House mouse   | Aquaporin 3 [Mus Musculus]                            |
| EDL01600.1       | House mouse   | Aquaporin 4, Isoform Cra_A [Mus Musculus]             |
| AAD32491.1       | House mouse   | Aquaporin 5 [Mus Musculus]                            |
| ABH01263.1       | House mouse   | Aquaporin 6 [Mus Musculus]                            |
| EDL05417.1       | House mouse   | Aquaporin 7, Isoform Cra_A [Mus Musculus]             |
| EDL17310.1       | House mouse   | Aquaporin 8, Isoform Cra_A, Partial [Mus Musculus]    |
| EDL26217.1       | House mouse   | Aquaporin 9, Isoform Cra_A [Mus Musculus]             |
| EDL16320.1       | House mouse   | Aquaporin 11, Isoform Cra_A [Mus Musculus]            |
| EDL39974.1       | House mouse   | Aquaporin 12, Isoform Cra_A [Mus Musculus]            |
| P30301.1         | Human         | Aquaporin_0_Homo sapiens                              |
| NP_932766.1      | Human         | Aquaporin-1 Isoform 1 [Homo Sapiens]                  |
| NP_000477.1      | Human         | Aquaporin-2 [Homo Sapiens]                            |
| AAP35863.1       | Human         | Aquaporin 3 [Homo Sapiens]                            |
| NP_001641.1      | Human         | Aquaporin-4 Isoform M1 [Homo Sapiens]                 |
| EAW58110.1       | Human         | Aquaporin 5 [Homo Sapiens]                            |
| Q13520.2         | Human         | Aquaporin-6 [Homo Sapiens]                            |
| EAW58505.1       | Human         | Aquaporin 7, Isoform Cra_A [Homo Sapiens]             |
| NP_001160.2      | Human         | Aquaporin-8 [Homo Sapiens]                            |
| BAA24864.1       | Human         | Aquaporin 9 [Homo Sapiens]                            |
| AAH74896.1       | Human         | Aquaporin 10 [Homo Sapiens]                           |
| BAC45004.1       | Human         | Aquaporin 11 [Homo Sapiens]                           |
| Q8IXF9.1         | Human         | Aquaporin-12A [Homo Sapiens]                          |
| XP_021364227.1   | Yesso scallop | Aquaporin-1-Like Isoform X1 [Mizuhopecten Yessoensis] |
| XP_021373368.1   | Yesso scallop | Aquaporin-8-Like [Mizuhopecten Yessoensis]            |
| XP_021359304.1   | Yesso scallop | Aquaporin-9-Like Isoform X1 [Mizuhopecten Yessoensis] |
| XP_021370233.1   | Yesso scallop | Aquaporin-11 [Mizuhopecten Yessoensis]                |
| FJ666326         | Zebrafish     | Aquaporin-0_ [Danio rerio]                            |
| AAV34608.1       | Zebrafish     | Aquaporin 1 [Danio Rerio]                             |
| AAH44188.1       | Zebrafish     | Aquaporin 3 [Danio Rerio]                             |
| NP_001003749.1   | Zebrafish     | Aquaporin-4 Isoform 1 [Danio Rerio]                   |
| NP_956204        | Zebrafish     | Aquaporin-7 [Danio Rerio]                             |
| AAW64464.1       | Zebrafish     | Aquaporin 8 [Danio Rerio]                             |
| NP_001028268.1   | Zebrafish     | Aquaporin-9A [Danio Rerio]                            |
| AAH75911.1       | Zebrafish     | Aquaporin 10 [Danio Rerio]                            |
| NP_001314822.1   | Zebrafish     | Aquaporin-11 [Danio Rerio]                            |
| NP_001039327.1   | Zebrafish     | Aquaporin 12 [Danio Rerio]                            |

**Supplementary Table S2.** Quality control and mapping statistics associated with individual sequencing libraries from the different blue mussel (*M. edulis*) treatments.

| Treatment         | Sample code | Raw reads <sup>1</sup> | Clean reads <sup>2</sup> | % Q20 <sup>3</sup> | % GC <sup>4</sup> | % reads mapped <sup>5</sup> |
|-------------------|-------------|------------------------|--------------------------|--------------------|-------------------|-----------------------------|
| 23‰ 5°C (control) | A1          | 23274003               | 22917823                 | 98.18              | 34.56             | 81.28                       |
|                   | A2          | 24153587               | 23730425                 | 97.24              | 34.45             | 82.23                       |
|                   | A3          | 31275830               | 30404027                 | 97.53              | 34.53             | 81.69                       |
|                   | A4          | 33102473               | 32269107                 | 97.44              | 34.56             | 82.61                       |
|                   | A5          | 23397201               | 23231153                 | 97.40              | 34.59             | 80.67                       |
| 23‰ 30°C          | B1          | 22493423               | 22138685                 | 97.37              | 34.33             | 80.76                       |
|                   | B2          | 28756196               | 27971989                 | 97.38              | 34.35             | 80.97                       |
|                   | B3          | 25309340               | 25000434                 | 97.50              | 34.23             | 81.81                       |
|                   | B4          | 32698528               | 32236872                 | 97.48              | 33.96             | 78.37                       |
|                   | B5          | 30632235               | 30284429                 | 97.39              | 34.56             | 79.57                       |
| 23‰ 33°C          | C1          | 25897101               | 25453251                 | 97.53              | 34.79             | 85.33                       |
|                   | C2          | 24378855               | 24068087                 | 97.25              | 34.74             | 82.07                       |
|                   | C3          | 24025104               | 23481792                 | 98.26              | 34.50             | 79.38                       |
|                   | C4          | 21500290               | 21108950                 | 98.31              | 34.66             | 83.36                       |
|                   | C5          | 23003586               | 22666638                 | 97.26              | 34.01             | 82.63                       |
| 15‰ 5°C           | D1          | 30225306               | 29742611                 | 97.46              | 34.05             | 81.64                       |
|                   | D2          | 24215632               | 23868710                 | 98.19              | 34.82             | 81.66                       |
|                   | D3          | 20009423               | 19639696                 | 97.19              | 33.61             | 81.30                       |
|                   | D4          | 24677531               | 24166991                 | 97.34              | 34.38             | 82.44                       |
|                   | D5          | 23255190               | 22885344                 | 97.52              | 34.55             | 78.61                       |
| 15‰ 30°C          | E1          | 24594244               | 24306333                 | 97.46              | 33.94             | 81.11                       |
|                   | E2          | 31904273               | 31494942                 | 97.46              | 35.24             | 84.45                       |
|                   | E3          | 29302837               | 28828826                 | 97.48              | 34.28             | 79.42                       |
|                   | E4          | 28276293               | 27761226                 | 97.32              | 35.02             | 84.31                       |
|                   | E5          | 27448562               | 26909446                 | 97.42              | 34.08             | 78.14                       |
| 15‰ 33°C          | F1          | 25408759               | 25037037                 | 97.16              | 34.38             | 82.40                       |
|                   | F2          | 27247428               | 26668077                 | 97.48              | 35.57             | 82.39                       |
|                   | F3          | 26886181               | 26378084                 | 96.83              | 34.65             | 78.78                       |
|                   | F4          | 21893430               | 21255634                 | 97.07              | 34.95             | 81.00                       |
|                   | F5          | 31325639               | 30819053                 | 97.52              | 34.78             | 80.66                       |
| 5‰ 5°C            | G1          | 25752439               | 25285550                 | 98.15              | 34.90             | 80.17                       |
|                   | G2          | 31105025               | 30784218                 | 98.31              | 35.44             | 81.52                       |
|                   | G3          | 22102779               | 21752714                 | 98.23              | 35.01             | 77.76                       |
|                   | G4          | 19136478               | 18925398                 | 98.26              | 35.68             | 77.19                       |
|                   | G5          | 24805418               | 24470503                 | 98.28              | 35.24             | 79.07                       |

Average sequencing base error rate for all libraries was 0.03%

<sup>1</sup>Total number of raw reads

<sup>2</sup>Number of reads after filtering

<sup>3</sup>Percentage of bases with correct base recognitions rates are > 99% in total bases

<sup>4</sup>Percentages of G and C in total bases

<sup>5</sup> Percentage of library reads mapping back to the main transcriptome

**Supplementary Table S3.** Gene Ontology term (GO) enrichment results for upregulated gene expression in blue mussels (*M. edulis*). Abbreviations: BP: Biological process; CC: Cellular Component; MF: Molecular Function.

| Category              | ID         | Description                                  | Adjusted p-value |
|-----------------------|------------|----------------------------------------------|------------------|
| 23‰ 30°C vs. 23‰ 5°C  |            |                                              |                  |
| BP                    | GO:0000902 | cell morphogenesis                           | 3.62E-07         |
| 23‰ 33°C vs. 23‰ 5°C  |            |                                              |                  |
| BP                    | GO:0000902 | cell morphogenesis                           | 1.64E-08         |
| MF                    | GO:0003700 | DNA-binding transcription factor activity    | 5.79E-07         |
| BP                    | GO:0009058 | biosynthetic process                         | 4.23E-05         |
| BP                    | GO:0034641 | cellular nitrogen compound metabolic process | 3.20E-03         |
| BP                    | GO:0048856 | anatomical structure development             | 3.20E-03         |
| CC                    | GO:0005634 | nucleus                                      | 3.26E-03         |
| MF                    | GO:0019899 | enzyme binding                               | 3.41E-02         |
| MF                    | GO:0051082 | unfolded protein binding                     | 3.43E-02         |
| CC                    | GO:0005615 | extracellular space                          | 4.11E-02         |
| 15‰ 5°C vs. 23‰ 5°C   |            |                                              |                  |
| BP                    | GO:0007155 | cell adhesion                                | 3.71E-02         |
| CC                    | GO:0005576 | extracellular region                         | 3.71E-02         |
| 5‰ 5°C vs. 23‰ 5°C    |            |                                              |                  |
| MF                    | GO:0003700 | DNA-binding transcription factor activity    | 5.03E-03         |
| BP                    | GO:0007155 | cell adhesion                                | 1.38E-02         |
| CC                    | GO:0005856 | cytoskeleton                                 | 3.30E-02         |
| MF                    | GO:0003924 | GTPase activity                              | 3.55E-02         |
| CC                    | GO:0005811 | lipid droplet                                | 3.55E-02         |
| 15‰ 33°C vs. 15‰ 30°C |            |                                              |                  |
| MF                    | GO:0003700 | DNA-binding transcription factor activity    | 6.01E-03         |
| BP                    | GO:0006457 | protein folding                              | 6.01E-03         |
| BP                    | GO:0000902 | cell morphogenesis                           | 9.48E-03         |
| BP                    | GO:0034641 | cellular nitrogen compound metabolic process | 1.61E-02         |
| CC                    | GO:0005615 | extracellular space                          | 1.64E-02         |
| BP                    | GO:0048856 | anatomical structure development             | 2.74E-02         |
| CC                    | GO:0005576 | extracellular region                         | 4.15E-02         |
| 15‰ 30°C vs. 15‰ 5°C  |            |                                              |                  |
| BP                    | GO:0000902 | cell morphogenesis                           | 1.56E-09         |
| BP                    | GO:0048856 | anatomical structure development             | 4.41E-05         |
| BP                    | GO:0006457 | protein folding                              | 2.71E-03         |
| MF                    | GO:0051082 | unfolded protein binding                     | 2.71E-03         |
| MF                    | GO:0043167 | ion binding                                  | 4.03E-02         |

15‰ 33°C vs. 15‰ 5°C

|    |            |                                              |          |
|----|------------|----------------------------------------------|----------|
| BP | GO:000902  | cell morphogenesis                           | 1.46E-10 |
| MF | GO:0051082 | unfolded protein binding                     | 5.50E-09 |
| MF | GO:0003700 | DNA-binding transcription factor activity    | 4.24E-08 |
| BP | GO:0048856 | anatomical structure development             | 1.55E-05 |
| BP | GO:0006457 | protein folding                              | 3.16E-05 |
| CC | GO:0005615 | extracellular space                          | 1.90E-04 |
| BP | GO:0034641 | cellular nitrogen compound metabolic process | 7.32E-04 |
| BP | GO:0009058 | biosynthetic process                         | 9.61E-04 |
| BP | GO:0006950 | response to stress                           | 9.67E-04 |
| BP | GO:0000278 | mitotic cell cycle                           | 1.01E-03 |
| BP | GO:0007049 | cell cycle                                   | 2.22E-03 |
| CC | GO:0005886 | plasma membrane                              | 8.54E-03 |
| CC | GO:0005783 | endoplasmic reticulum                        | 1.45E-02 |
| BP | GO:0000003 | reproduction                                 | 1.58E-02 |
| MF | GO:0019899 | enzyme binding                               | 1.84E-02 |
| CC | GO:0005634 | nucleus                                      | 2.27E-02 |
| BP | GO:0140014 | mitotic nuclear division                     | 2.51E-02 |
| BP | GO:0042592 | homeostatic process                          | 3.28E-02 |
| MF | GO:0016779 | nucleotidyltransferase activity              | 3.72E-02 |

5‰ 5°C vs. 15‰ 5°C

|    |            |                                           |          |
|----|------------|-------------------------------------------|----------|
| MF | GO:0003700 | DNA-binding transcription factor activity | 1.27E-03 |
| BP | GO:0002376 | immune system process                     | 1.27E-03 |
| BP | GO:0008283 | cell proliferation                        | 8.77E-03 |
| BP | GO:0000003 | reproduction                              | 1.05E-02 |
| BP | GO:0007049 | cell cycle                                | 1.05E-02 |

No enrichment

23‰ 33°C vs. 23‰ 30°C

15‰ 30°C vs. 23‰ 30°C

15‰ 33°C vs. 23‰ 33°C

---

**Supplementary Table S4.** Shared Gene Ontology term (GO) enrichment categories for upregulated gene expression between different blue mussels (*M. edulis*) treatment condition comparisons, highlighting the number of shared genes within shared GO terms for: (i) low salinity exposure, (ii) heat stress, (iii) heat stress under low salinity exposure, (iv) 30°C heat stress under low salinity exposure (v) 33°C heat stress under low salinity exposure

(i): Low salinity exposure

| Enriched GO category | GO ID      | Description                               | No of genes              |                               |                                    |     |
|----------------------|------------|-------------------------------------------|--------------------------|-------------------------------|------------------------------------|-----|
|                      |            |                                           | Low salinity vs. control | Very low salinity vs. control | Very low salinity vs. Low salinity |     |
| BP                   | GO:0007155 | cell adhesion                             | 14                       | 46                            | N/A                                | 60  |
| MF                   | GO:0003700 | DNA-binding transcription factor activity | N/A                      | 62                            | 41                                 | 103 |
|                      |            |                                           |                          |                               |                                    | 24  |

(ii): Heat stress

| Enriched GO category | GO ID      | Description        | No of genes      |                  |               |    |
|----------------------|------------|--------------------|------------------|------------------|---------------|----|
|                      |            |                    | 30°C vs. control | 33°C vs. control | 33°C vs. 30°C |    |
| BP                   | GO:0000902 | cell morphogenesis | 15               | 17               | N/A           | 32 |
|                      |            |                    |                  |                  |               | 13 |

(iii): Heat stress (30°C and 33°C) under low salinity exposure

| Enriched GO category | GO ID      | Description                                  | No of genes                        |                                    |                                         |     |
|----------------------|------------|----------------------------------------------|------------------------------------|------------------------------------|-----------------------------------------|-----|
|                      |            |                                              | Low salinity+30°C vs. low salinity | Low salinity+33°C vs. low salinity | Low salinity+33°C vs. low salinity+30°C |     |
| BP                   | GO:0000902 | cell morphogenesis                           | 15                                 | 23                                 | 10                                      | 48  |
| BP                   | GO:0048856 | anatomical structure development             | 22                                 | 39                                 | 23                                      | 84  |
| BP                   | GO:0006457 | protein folding                              | 11                                 | 22                                 | 15                                      | 48  |
| MF                   | GO:0051082 | unfolded protein binding                     | 9                                  | 23                                 | 15                                      | 47  |
| BP                   | GO:0034641 | cellular nitrogen compound metabolic process | N/A                                | 221                                | 158                                     | 379 |
| MF                   | GO:0003700 | DNA-binding transcription factor activity    | N/A                                | 42                                 | 26                                      | 68  |
| CC                   | GO:0005615 | extracellular space                          | N/A                                | 20                                 | 13                                      | 33  |
|                      |            |                                              |                                    |                                    |                                         | 9   |

(iv): 30°C heat stress under low salinity exposure

| Enriched GO category | GO ID      | Description        | No of genes                        |                  |       |        |
|----------------------|------------|--------------------|------------------------------------|------------------|-------|--------|
|                      |            |                    | Low salinity+30°C vs. low salinity | 30°C vs. control | Total | Shared |
| BP                   | GO:0000902 | cell morphogenesis | 15                                 | 15               | 30    | 11     |

(v): 33°C heat stress under low salinity exposure

| Enriched<br>GO<br>category | GO ID      | Description                                  | No of genes                              |                        |       |        |
|----------------------------|------------|----------------------------------------------|------------------------------------------|------------------------|-------|--------|
|                            |            |                                              | Low salinity+33°C<br>vs.<br>low salinity | 33°C<br>vs.<br>control | Total | Shared |
| BP                         | GO:000902  | cell morphogenesis                           | 23                                       | 17                     | 40    | 15     |
| MF                         | GO:0051082 | unfolded protein binding                     | 23                                       | 9                      | 32    | 5      |
| MF                         | GO:0003700 | DNA-binding transcription factor activity    | 42                                       | 31                     | 73    | 19     |
| BP                         | GO:0048856 | anatomical structure development             | 39                                       | 24                     | 63    | 19     |
| CC                         | GO:0005615 | extracellular space                          | 20                                       | 11                     | 31    | 7      |
| BP                         | GO:0034641 | cellular nitrogen compound metabolic process | 221                                      | 147                    | 368   | 57     |
| BP                         | GO:0009058 | biosynthetic process                         | 181                                      | 131                    | 312   | 50     |
| MF                         | GO:0019899 | enzyme binding                               | 23                                       | 17                     | 40    | 9      |
| CC                         | GO:0005634 | nucleus                                      | 98                                       | 73                     | 171   | 26     |

**Supplementary Figure S1.** Primer sequences used in Nielsen et al. (2021) aligned with mapped transcripts from the blue mussel (*M. edulis*) transcriptome in this study. Shaded base pairs highlight agreements, a) *HSP70* primer alignment showing 100% identical sites to the best matching transcript, b) *HSP90* primer alignment showing 95% identical sites to the best matching transcripts, c) Heatmap showing relative fold change expression of identified transcripts using primer sequences. Cluster 53306.116803 (representing *HSP90*), and clusters 53306.127741 and 53306.129262 (representing *HSP70*) show similar expression patterns to the results seen in Nielsen et al. (2021). Red = High expression; Blue = Low expression.

a)

|                                 |      |                       |        |    |
|---------------------------------|------|-----------------------|--------|----|
| HSP 70 primer reverse           | ---- | cctgcaatgaaaccagcatcc | -----  | 21 |
| Cluster-53306.127741 (reversed) | aagt | cctgcaatgaaaccagcatcc | tttgtg | 31 |
| Cluster-53306.129262            | aagt | cctgcaatgaaaccagcatcc | tttgtg | 31 |

b)

|                                 |         |   |                     |          |    |
|---------------------------------|---------|---|---------------------|----------|----|
| HSP 90 primer                   | -----   | t | cagcaacaaggtaagcggg | -----    | 20 |
| Cluster-53306.116781 extraction | actttat | c | agaaacaaggtaagcggg  | agtagaaa | 33 |
| Cluster-53306.117137 extraction | actttat | c | agaaacaaggtaagcggg  | agtagaaa | 33 |
| Cluster-53306.116803 extraction | actttat | c | agaaacaaggtaagcggg  | agtagaaa | 33 |
| Cluster-53306.116689 extraction | actttat | c | agaaacaaggtaagcggg  | agtagaaa | 33 |
| Cluster-53306.116738 extraction | actttat | c | agaaacaaggtaagcggg  | agtagaaa | 33 |

c)

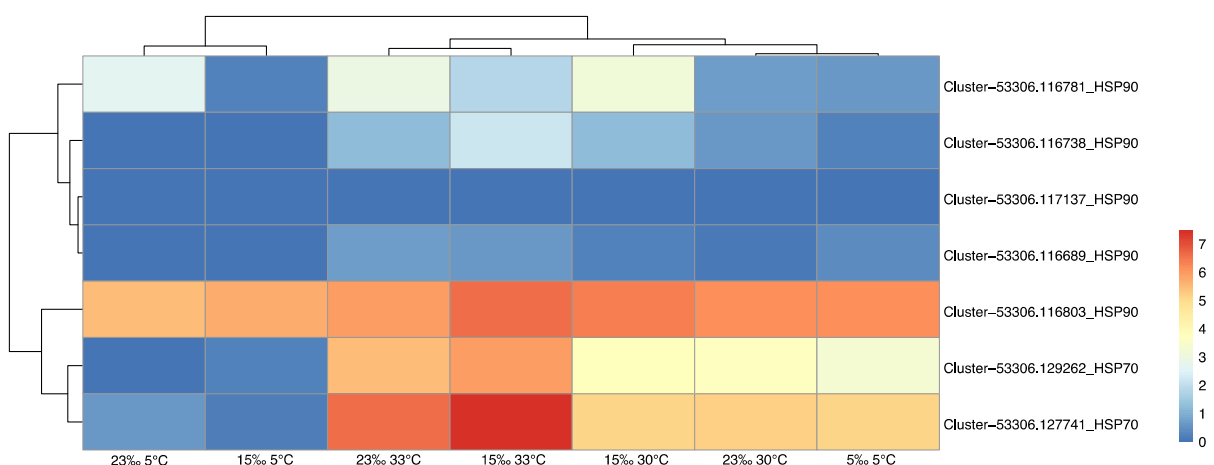

Supplement: s1 [file s1]
